# Supplementary material for: Structural Elucidation and Absolute Stereochemistry for Pharma Compounds Using MicroED
Source: PubMed Central journal article supplement — Org Lett. 2024 Aug 8;26(33):6944–9. doi: 10.1021/acs.orglett.4c01865 (PMC11348424; doi:10.1021/acs.orglett.4c01865), 2024-08-08
Supplement: ol4c01865_si_001.pdf [file ol4c01865_si_001.pdf]

# Structural Elucidation and Absolute Stereochemistry for Pharma Compounds using MicroED

Lygia Silva de Moraes<sup>1‡</sup>, Jessica E. Burch<sup>1,2,5‡</sup>, David A. Delgadillo<sup>1</sup>, Isabel Hernandez Rodriguez<sup>1</sup>, Huanghao Mai<sup>1</sup>, Austin G. Smith<sup>3†</sup>, Seb Caille<sup>3</sup>, Shawn D. Walker<sup>3†</sup>, Ryan P. Wurz<sup>4</sup>, Victor J. Cee<sup>4†</sup>, Jose A. Rodriguez<sup>2</sup>, Dan Gostovic<sup>5</sup>, Kyle Quasdorf<sup>3\*</sup>, Hosea M. Nelson<sup>1,2\*</sup>

<sup>1</sup> Division of Chemistry and Chemical Engineering, California Institute of Technology, Pasadena, California 91125, United States.

<sup>2</sup> Department of Chemistry and Biochemistry, University of California, Los Angeles, Los Angeles, California 90095, United States.

<sup>3</sup> Drug Substance Technologies - Synthetics, Process Development <sup>4</sup> Medicinal Chemistry, Amgen Inc., One Amgen Center Drive, Thousand Oaks, California 91320, United States.

<sup>5</sup> MicroEDLab.com, 1623 Central Avenue Suite 18, Cheyenne, Wyoming 82001, United States.

\*Correspondence to: [quasdorf@amgen.com](mailto:quasdorf@amgen.com), [hosea@caltech.edu](mailto:hosea@caltech.edu)

## Supporting Information

### Contents

|                                                                |    |
|----------------------------------------------------------------|----|
| 1. Materials .....                                             | 2  |
| 2. Available instruments for microED .....                     | 3  |
| 3. General microcrystal electron diffraction experiment.....   | 3  |
| 4. Room temperature TEM screening procedure .....              | 4  |
| 5. Cryogenic TEM screening.....                                | 7  |
| 6. Additional screening and recrystallization of samples ..... | 9  |
| 7. Transmission electron microscope images of crystals .....   | 11 |
| 8. Automated data processing procedure .....                   | 12 |
| 9. Data processing for the kinematical approach.....           | 12 |
| 10. Data Processing for the dynamical approach. ....           | 13 |
| 11. Kinematical and Dynamical Refinement with Jana2020. ....   | 13 |
| 12. Dynamical refinement results .....                         | 14 |
| 13. Single crystal X-ray diffraction.....                      | 17 |
| 14. References.....                                            | 18 |

## 1. Materials

**Table S1.** Fifteen pharmaceutical compounds analyzed in this study.

| Compound | Name                                                                                                                                                                                                                           | Compound Source     | References | Datasets collected |
|----------|--------------------------------------------------------------------------------------------------------------------------------------------------------------------------------------------------------------------------------|---------------------|------------|--------------------|
| 1        | (2R,3S)-N-(4-(2,6-dimethoxyphenyl)-5-(5-methylpyridin-3-yl)-4H-1,2,4-triazol-3-yl)-3-(5-methylpyrimidin-2-yl)butane-2-sulfonamide                                                                                              | Medicinal Chemistry | [1]        | 6                  |
| 2        | (2R,3S)-3-(5-methoxypyridin-2-yl)butane-2-sulfonamide                                                                                                                                                                          | Medicinal Chemistry | [1,2]      | 3                  |
| 3        | (2S,3R)-N-(4-(2,6-dimethoxyphenyl)-5-(5-methylpyridin-3-yl)-4H-1,2,4-triazol-3-yl)-3-(5-methylpyrimidin-2-yl)butane-2-sulfonamide                                                                                              | Medicinal Chemistry | [1]        | 18                 |
| 4        | (2S,3R)-3-(5-methoxypyridin-2-yl)butane-2-sulfonamide                                                                                                                                                                          | Medicinal Chemistry | [1,2]      | 23                 |
| 5        | (R)-6'-chloro-3',4,4',5-tetrahydro-2H,2'H-spiro[benzo[b][1,4]oxazepine-3,1'-naphthalene]-7-carboxylic acid ((1R,4S)-7,7-dimethyl-2-oxobicyclo[2.2.1]heptan-1-yl)methansulfonate                                                | Process Chemistry   | [3]        | 8                  |
| 6        | (2S,3R)-3-(5-methylpyrazin-2-yl)butane-2-sulfonamide                                                                                                                                                                           | Medicinal Chemistry | [1,2,4–8]  | 9                  |
| 7        | (1S,3'R,6'R,7'S,8'E,11'S,12'R)-6-chloro-7'-hydroxy-11',12'-dimethyl-3,4-dihydro-2H,15'H-spiro[naphthalene-1,22'-[20]oxa[13]thia[1,14]diazatetracyclo[14.7.2.03,6.019,24]pentacos[a]8,16,18,24]tetraen]-15'-one 13',13'-dioxide | Process Chemistry   | [3]        | 10                 |
| 8        | (S)-6'-chloro-3',4,4',5-tetrahydro-2H,2'H-spiro[benzo[b][1,4]oxazepine-3,1'-naphthalene]-7-carboxylic acid ((1S,4R)-7,7-dimethyl-2-oxobicyclo[2.2.1]heptan-1-yl)methansulfonate                                                | Process Chemistry   | [3]        | 8                  |
| 9        | (S)-6'-chloro-5-(((1R,2R)-2-((S)-1-hydroxyallyl)cyclobutyl)methyl)-N-(((2R,3S)-3-methylhex-5-en-2-yl)sulfonyl)-3',4,4',5-tetrahydro-2H,2'H-spiro[benzo[B][1,4]oxazepine-3,1'-naphthalene]-7-carboxamide                        | Process Chemistry   | [3]        | 12                 |
| 10       | (R)-1-phenylethan-1-aminium (S)-6'-chloro-5-(((1R,2R)-2-((S)-1-hydroxyallyl)cyclobutyl)methyl)-3',4,4',5-tetrahydro-2H,2'H-spiro[benzo[b][1,4]oxazepine-3,1'-naphthalene]-7-carboxylate                                        | Process Chemistry   | [3]        | 2                  |
| 11       | (S)-1-(5-fluoropyrimidin-2-yl)piperidine-3-sulfonamide                                                                                                                                                                         | Medicinal Chemistry | [4,6]      | 8                  |
| 12       | (2R,3S)-3-(5-methylpyrazin-2-yl)butane-2-sulfonamide                                                                                                                                                                           | Medicinal Chemistry | [1,2,4–8]  | 3                  |
| 13       | (R)-1-(5-fluoropyrimidin-2-yl)piperidine-3-sulfonamide                                                                                                                                                                         | Medicinal Chemistry | [4,6]      | 4                  |
| 14       | (2R,3S)-3-methylhex-5-ene-2-sulfonamide                                                                                                                                                                                        | Process Chemistry   | [9]        | 5                  |
| 15       | methyl piperazine-1-carboxylate phosphate hydrate                                                                                                                                                                              | Process Chemistry   | [10]       | 15                 |
|          | Figure 5a                                                                                                                                                                                                                      | Medicinal Chemistry | [11-13]    | -                  |
|          | Figure 5b                                                                                                                                                                                                                      | PROTACs             | [14]       | -                  |

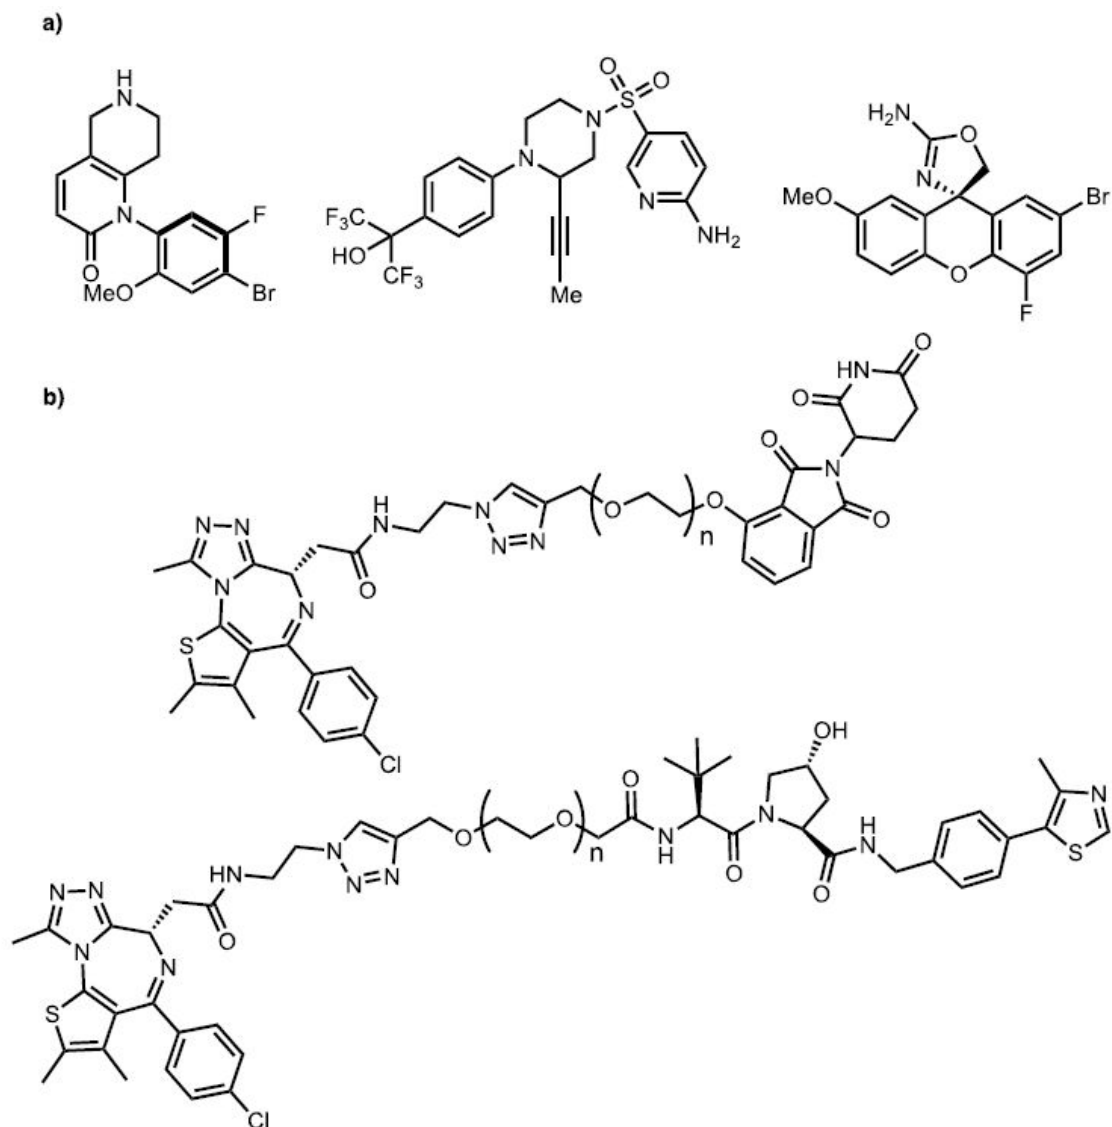

**Figure S1.** Molecular structure of remaining fifteen compounds not solved with microED, where (a) illustrates enantiomeric pairs (only one enantiomer drawn) and (b) illustrates PROTACs,  $n = 0-4$ .

## 2. Available instruments for microED

- Thermo Fisher Scientific TEMs with microED package:  
<https://www.thermofisher.com/br/en/home/electron-microscopy/products/transmission-electron-microscopes.html>
- Rigaku Synergy-ED: <https://www.synergy-ed.com/>
- Eldico scientific ED-1: <https://www.eldico-scientific.com/>

## 3. General microcrystal electron diffraction experiment

All diffraction experiments were performed in a Thermo Fisher Scientific Talos F200C transmission electron microscope equipped with a Ceta-D detector operating at an accelerating voltage of 200 keV. To screen for crystallinity, particles were located on the grid in imaging mode at 2600x magnification. After identifying a particle of interest, a diffraction pattern was recorded by isolating a region of the

particle using a selected area aperture and entering parallel-illuminated diffraction mode utilizing the low dose software on the Thermo Fisher microscope user interface.

A single image of the diffraction pattern was taken on a Thermo Fisher Scientific Ceta-D camera. If user inspection of the diffraction pattern suggested that the particle was monocrystalline and provided  $<1.2$  Å resolution diffraction, the eucentric height of the sample was adjusted in imaging mode to ensure the crystal would remain within the selected area aperture throughout a tilt series with a maximum tilt range of  $\pm 65^\circ$ . After making these adjustments and returning to diffraction mode, a continuously rotating electron diffraction movie was collected by rotating the stage at a rate of  $0.3^\circ \text{ s}^{-1}$ . The Ceta-D CMOS 4k x 4k camera was operated using rolling shutter mode and continuously integrated at a rate of 3 seconds per frame with binning by 2 to produce 2k x 2k images. Diffraction movies were saved as SER files. Movies were saved with a standardized naming format and processed using the automated data workflow while additional movies were collected. These processed movies were manually re-indexed to different space groups and/or merged with other datasets as needed until preliminary solutions were obtained.

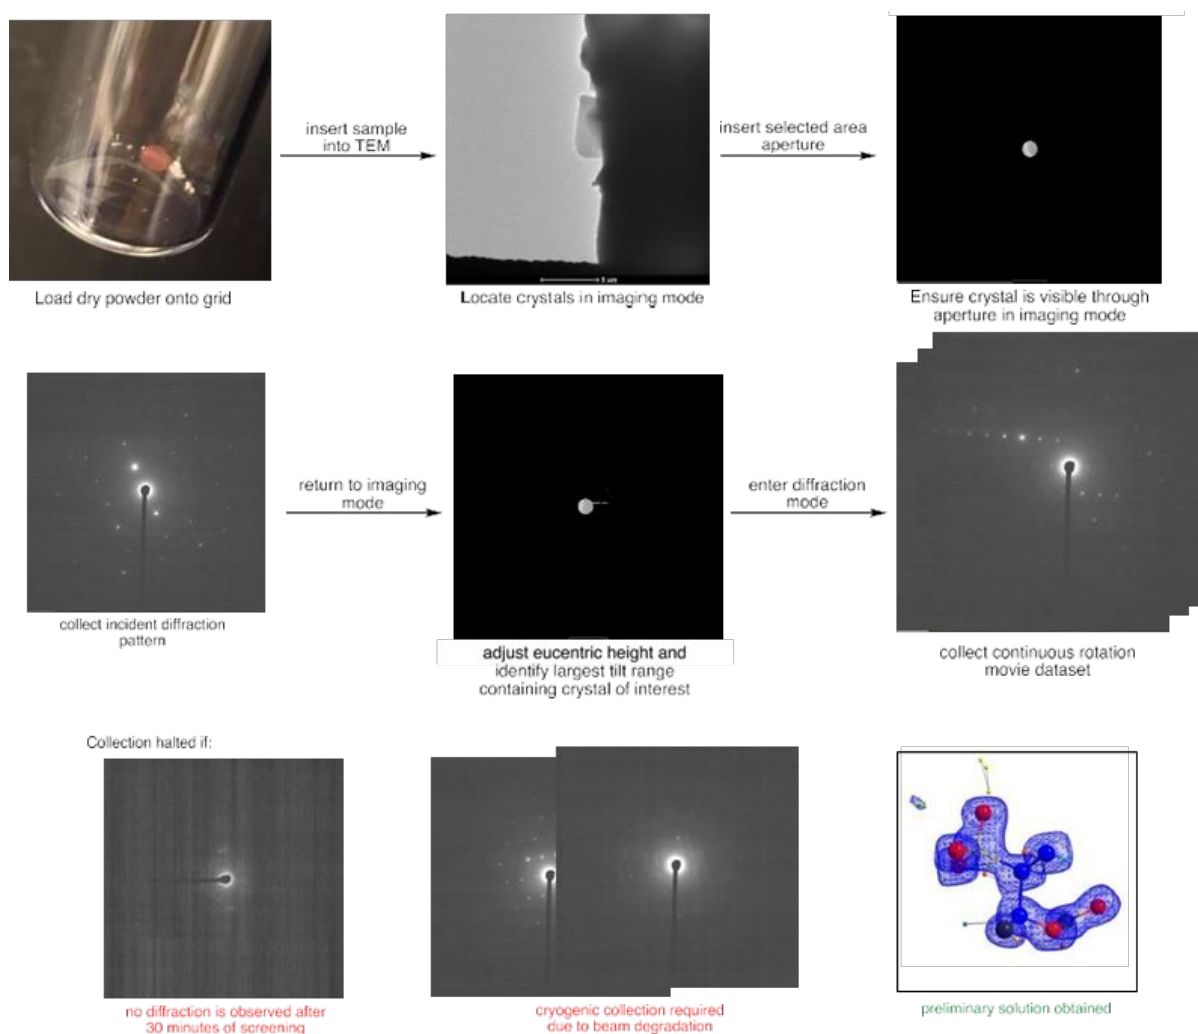

**Figure S2.** Representative data collection workflow.

#### 4. Room temperature TEM screening procedure

Milligram to sub-milligram quantities of dry powder were placed into a dram vial as received and manually ground with a glass pipette. A pure carbon 200 mesh Cu grid or lacey carbon Cu grid was

placed inside of the vial and gently shaken together with the powder to “dry load” the grid (Figure S2). The grid was removed with Dumont straight self-closing tweezers and the tweezers were gently tapped against a lab bench while holding the grid to shake off excess powder. This sample was clipped into a single tilt holder and inserted into a well-aligned Thermo Fisher Scientific Talos F200C transmission electron microscopy for microED experiments using the experimental procedure described in the Supporting Information File, Section 2. Screening was halted if no diffraction was observed after 30 minutes, the sample visibly lost resolution over the course of a single movie, or a preliminary solution with >90% of expected atoms was obtained. Results for samples 1-6 are observed in Figure S3 and Table S2,

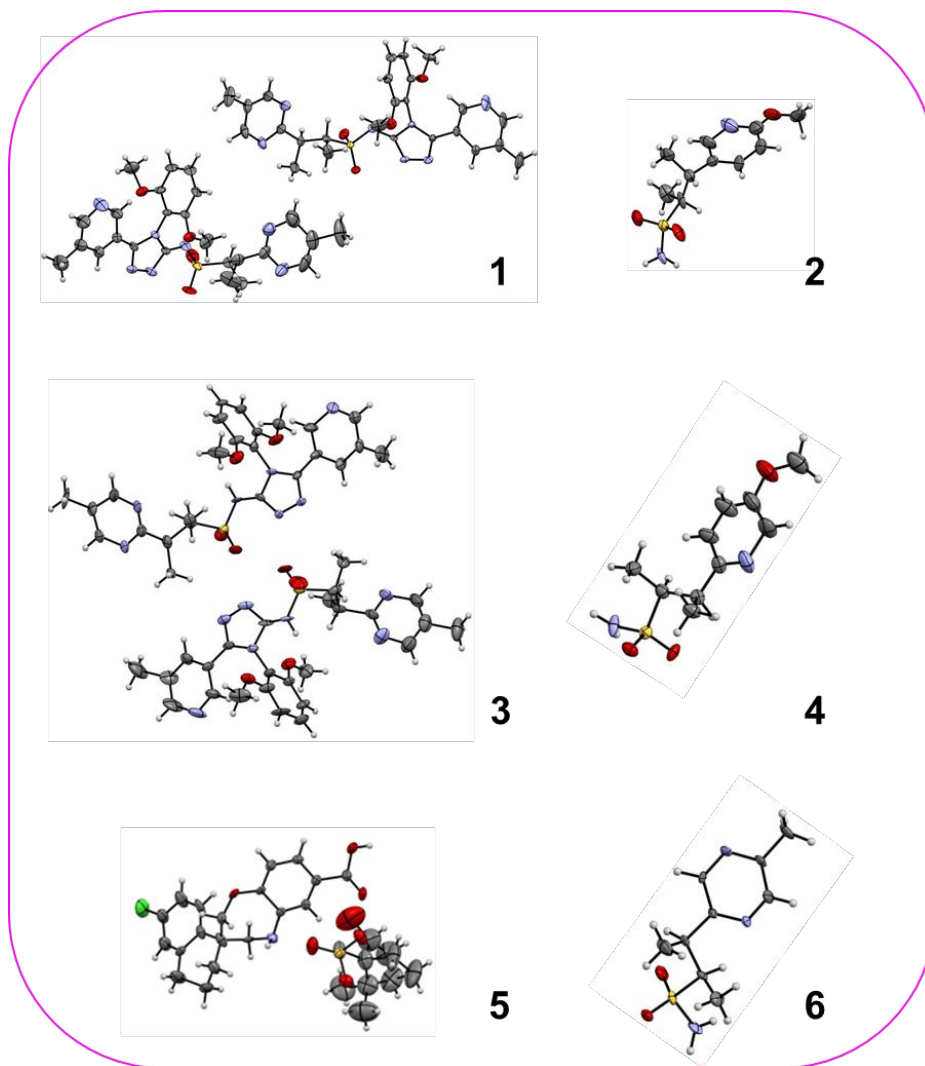

**Figure S3.** Contents of the asymmetric unit of compounds 1-6 obtained by room temperature screening. Ellipsoids probability: 50 %

**Table S2.** Selected crystallographic data for compounds **1-6** screened at room temperature.

| Compound                                           | 1                                                                                                    | 2                                                                           | 3                                                                                                    | 4                                                                            | 5                                                                                                     | 6                                                                            |
|----------------------------------------------------|------------------------------------------------------------------------------------------------------|-----------------------------------------------------------------------------|------------------------------------------------------------------------------------------------------|------------------------------------------------------------------------------|-------------------------------------------------------------------------------------------------------|------------------------------------------------------------------------------|
| <b>Empirical formula</b>                           | C <sub>25</sub> H <sub>29</sub> N <sub>7</sub> O <sub>4</sub> S                                      | C <sub>10</sub> H <sub>16</sub> N <sub>2</sub> O <sub>3</sub> S             | C <sub>25</sub> H <sub>29</sub> N <sub>7</sub> O <sub>4</sub> S                                      | C <sub>10</sub> H <sub>16</sub> N <sub>2</sub> O <sub>3</sub> S              | C <sub>29</sub> H <sub>34</sub> NO <sub>7</sub> SCI                                                   | C <sub>9</sub> H <sub>15</sub> N <sub>3</sub> O <sub>2</sub> S               |
| <b>Formula weight</b>                              | 523.61                                                                                               | 244.31                                                                      | 523.61                                                                                               | 244.31                                                                       | 574.07                                                                                                | 229.3                                                                        |
| <b>Data Collection</b>                             |                                                                                                      |                                                                             |                                                                                                      |                                                                              |                                                                                                       |                                                                              |
| <b>Type of instrument</b>                          | Talos F200C                                                                                          | Talos F200C                                                                 | Talos F200C                                                                                          | Talos F200C                                                                  | Talos F200C                                                                                           | Talos F200C                                                                  |
| <b>Wavelength (Å)</b>                              | 0.0251                                                                                               | 0.0251                                                                      | 0.0251                                                                                               | 0.0251                                                                       | 0.0251                                                                                                | 0.0251                                                                       |
| <b>Data collection temperature (K)</b>             | 294(2)                                                                                               | 294(2)                                                                      | 294(2)                                                                                               | 294(2)                                                                       | 294(2)                                                                                                | 294(2)                                                                       |
| <b>Unit cell dimensions</b>                        | <i>a</i> = 9.3100(10) Å,<br><i>b</i> = 20.490(2) Å,<br><i>c</i> = 12.650(4) Å,<br>$\beta$ = 108.42 ° | <i>a</i> = 22.830(4) Å,<br><i>b</i> = 6.810(10) Å,<br><i>c</i> = 6.980(2) Å | <i>a</i> = 9.3100(10) Å,<br><i>b</i> = 20.450(2) Å,<br><i>c</i> = 12.680(4) Å,<br>$\beta$ = 108.40 ° | <i>a</i> = 6.840(2) Å,<br><i>b</i> = 22.820(4) Å,<br><i>c</i> = 6.9800(10) Å | <i>a</i> = 10.5200(10) Å,<br><i>b</i> = 10.220(2) Å,<br><i>c</i> = 12.660(4) Å,<br>$\beta$ = 110.33 ° | <i>a</i> = 7.4500(10) Å,<br><i>b</i> = 8.130(2) Å,<br><i>c</i> = 16.240(4) Å |
| <b>Volume</b>                                      | 2289.5(8)                                                                                            | 1085.2(4)                                                                   | 2290.7(8)                                                                                            | 1089.5(4)                                                                    | 1276.4(5)                                                                                             | 983.6(4)                                                                     |
| <b>Z, Z'</b>                                       | 2, 2                                                                                                 | 4, 1                                                                        | 2, 2                                                                                                 | 4, 1                                                                         | 2, 1                                                                                                  | 4, 1                                                                         |
| <b>Crystal system</b>                              | Monoclinic                                                                                           | Orthorhombic                                                                | Monoclinic                                                                                           | Orthorhombic                                                                 | Monoclinic                                                                                            | Orthorhombic                                                                 |
| <b>Space group</b>                                 | <i>P</i> 2 <sub>1</sub>                                                                              | <i>P</i> 2 <sub>1</sub> 2 <sub>1</sub> 2                                    | <i>P</i> 2 <sub>1</sub>                                                                              | <i>P</i> 2 <sub>1</sub> 2 <sub>1</sub> 2                                     | <i>P</i> 2 <sub>1</sub>                                                                               | <i>P</i> 2 <sub>1</sub> 2 <sub>1</sub> 2 <sub>1</sub>                        |
| <b>Density (calculated) (g/cm<sup>3</sup>)</b>     | 1.515                                                                                                | 1.495                                                                       | 1.518                                                                                                | 1.489                                                                        | 1.494                                                                                                 | 1.548                                                                        |
| <b>F(000)</b>                                      | 100                                                                                                  | 103                                                                         | 100                                                                                                  | 103                                                                          | 99                                                                                                    | 46                                                                           |
| <b>Measured reflections</b>                        | 6341                                                                                                 | 3816                                                                        | 5615                                                                                                 | 1212                                                                         | 2438                                                                                                  | 1652                                                                         |
| <b>Reflections with <i>I</i> &gt; 2s(<i>I</i>)</b> | 3849                                                                                                 | 870                                                                         | 3218                                                                                                 | 649                                                                          | 1379                                                                                                  | 975                                                                          |
| <b>Resolution (Å)</b>                              | 0.90                                                                                                 | 0.95                                                                        | 0.90                                                                                                 | 0.95                                                                         | 1.00                                                                                                  | 0.80                                                                         |
| <b>Completeness (%)</b>                            | 81.40                                                                                                | 82.90                                                                       | 85.50                                                                                                | 89.40                                                                        | 95.70                                                                                                 | 82.60                                                                        |
| <b>Index ranges</b>                                | 10 ≤ <i>h</i> ≤ -10,<br>23 ≤ <i>k</i> ≤<br>-24, 13 ≤ <i>l</i> ≤ -13                                  | 7 ≤ <i>h</i> ≤ -7,<br>25 ≤ <i>k</i> ≤<br>-25, 7 ≤ <i>l</i> ≤ -7             | 10 ≤ <i>h</i> ≤ -10,<br>21 ≤ <i>k</i> ≤<br>-21, 14 ≤ <i>l</i> ≤ -14                                  | 24 ≤ <i>h</i> ≤ -24,<br>7 ≤ <i>k</i> ≤<br>-7, 7 ≤ <i>l</i> ≤ -7              | 9 ≤ <i>h</i> ≤ -9,<br>10 ≤ <i>k</i> ≤<br>-10, 12 ≤ <i>l</i> ≤ -12                                     | 8 ≤ <i>h</i> ≤ -8,<br>9 ≤ <i>k</i> ≤<br>-9, 19 ≤ <i>l</i> ≤ -19              |

## 5. Cryogenic TEM screening

Milligram to sub-milligram quantities of dry powder were placed into a dram vial as received and manually ground with a glass pipette. A pure carbon 200 mesh Cu grid or lacey carbon Cu grid was placed inside of the vial and gently shaken together with the powder to “dry load” the grid. The grid was removed with Dumont straight self-closing tweezers and the tweezers were gently tapped against a lab bench while holding the grid to shake off excess powder. This sample was clipped into a Gatan 626 cryo holder at room temperature and inserted into a well-aligned Thermo Fisher Scientific Talos F200C transmission electron microscopy operating at an accelerating voltage of 200keV. After successful insertion, the cryo holder was cooled with liquid nitrogen until reaching a stable temperature of 80 K. After achieving stable temperature and low vacuum pressure, incident diffraction screening and movie collection were performed as described in Supporting Information, Section 2. Screening was halted after 3 hours, or if a preliminary solution with >90% of expected atoms was obtained. Results for samples collected in cryogenic temperatures are observed in Figure S4 and Table S3.

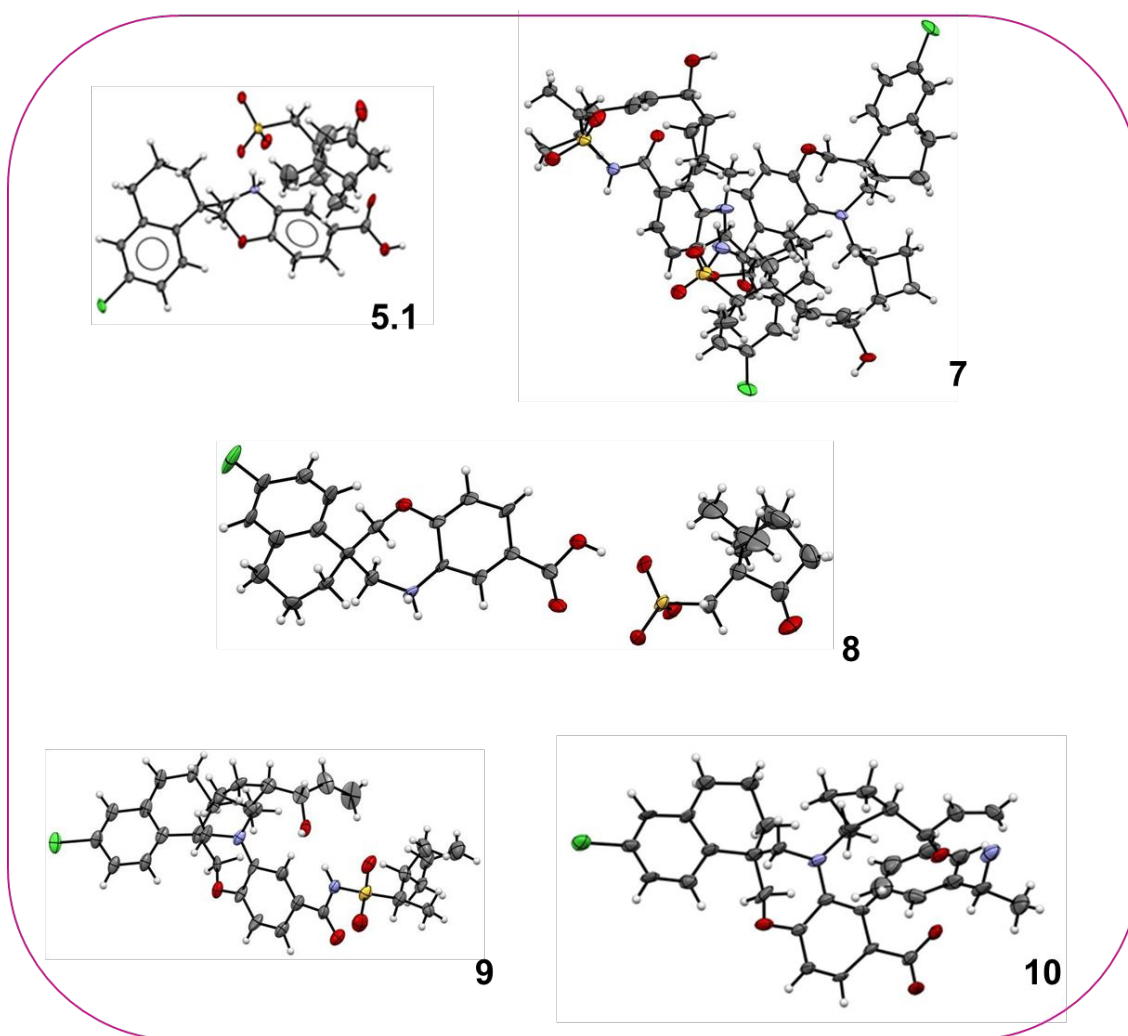

**Figure S4.** Contents of the asymmetric unit of compounds **5.1**, and **7-10** obtained at cryogenic temperature screening. Ellipsoids probability: 50 %

**Table S3.** Selected crystallographic data for compounds **5.1**, and **7-10** screened at cryogenic temperature.

| Compound                                  | 5.1                                                                        | 7                                                                                                         | 8                                                                          | 9                                                                 | 10                                                               |
|-------------------------------------------|----------------------------------------------------------------------------|-----------------------------------------------------------------------------------------------------------|----------------------------------------------------------------------------|-------------------------------------------------------------------|------------------------------------------------------------------|
| Empirical formula                         | C <sub>29</sub> H <sub>34</sub> NO <sub>7</sub> SCI                        | C <sub>32</sub> H <sub>39</sub> N <sub>2</sub> O <sub>5</sub> SCI                                         | C <sub>29</sub> H <sub>34</sub> NO <sub>7</sub> SCI                        | C <sub>34</sub> H <sub>43</sub> N <sub>2</sub> O <sub>5</sub> SCI | C <sub>35</sub> H <sub>36</sub> N <sub>2</sub> O <sub>4</sub> Cl |
| Formula weight                            | 574.07                                                                     | 599.16                                                                                                    | 576.08                                                                     | 626.26                                                            | 584.11                                                           |
| <b>Data Collection</b>                    |                                                                            |                                                                                                           |                                                                            |                                                                   |                                                                  |
| Type of instrument                        | Talos F200C                                                                | Talos F200C                                                                                               | Talos F200C                                                                | Talos F200C                                                       | Talos F200C                                                      |
| Wavelength (Å)                            | 0.0251                                                                     | 0.0251                                                                                                    | 0.0251                                                                     | 0.0251                                                            | 0.0251                                                           |
| Data collection temperature (K)           | 96(4)                                                                      | 96(4)                                                                                                     | 96(4)                                                                      | 96(4)                                                             | 96(4)                                                            |
| Unit cell dimensions                      | a = 10.4700(10) Å,<br>b = 10.260(2) Å,<br>c = 12.440(4) Å,<br>β = 109.92 ° | a = 11.3400(10) Å,<br>b = 11.340(2) Å,<br>c = 12.500(4) Å,<br>α = 73.74 °,<br>β = 69.36 °,<br>γ = 71.13 ° | a = 10.6900(10) Å,<br>b = 10.220(2) Å,<br>c = 12.680(4) Å,<br>β = 111.22 ° | a = 10.5200(10) Å,<br>b = 15.050(2) Å,<br>c = 17.020(4) Å         | a = 7.9800(10) Å,<br>b = 11.730(2) Å,<br>c = 28.850(4) Å         |
| Volume                                    | 1256.4(5)                                                                  | 1398.2(5)                                                                                                 | 1291.4(5)                                                                  | 2694.7(8)                                                         | 2700.5(7)                                                        |
| Z, Z'                                     | 2, 1                                                                       | 2, 2                                                                                                      | 2, 1                                                                       | 4, 1                                                              | 4, 1                                                             |
| Crystal system                            | Monoclinic                                                                 | Triclinic                                                                                                 | Monoclinic                                                                 | Orthorhombic                                                      | Orthorhombic                                                     |
| Space group                               | <i>P</i> 2 <sub>1</sub>                                                    | <i>P</i> 1                                                                                                | <i>P</i> 2 <sub>1</sub>                                                    | <i>P</i> 2 <sub>1</sub> 2 <sub>1</sub> 2 <sub>1</sub>             | <i>P</i> 2 <sub>1</sub> 2 <sub>1</sub> 2 <sub>1</sub>            |
| Density (calculated) (g/cm <sup>3</sup> ) | 1.523                                                                      | 1.423                                                                                                     | 1.482                                                                      | 1.546                                                             | 1.437                                                            |
| F(000)                                    | 99                                                                         | 243                                                                                                       | 99                                                                         | 105                                                               | 103                                                              |
| Measured reflections                      | 2474                                                                       | 6522                                                                                                      | 3824                                                                       | 2393                                                              | 3263                                                             |
| Reflections with I > 2s(I)                | 1787                                                                       | 3782                                                                                                      | 2409                                                                       | 1774                                                              | 2351                                                             |
| Resolution (Å)                            | 1.00                                                                       | 0.90                                                                                                      | 0.85                                                                       | 1.00                                                              | 0.85                                                             |
| Completeness (%)                          | 92.60                                                                      | 82.50                                                                                                     | 85.20                                                                      | 83.10                                                             | 68.60                                                            |
| Index ranges                              | 10 ≤ h ≤ -10, 10 ≤ k ≤ -10, 12 ≤ l ≤ -12                                   | 12 ≤ h ≤ -12, 12 ≤ k ≤ -12, 13 ≤ l ≤ -13                                                                  | 12 ≤ h ≤ -12, 11 ≤ k ≤ -11, 14 ≤ l ≤ -14                                   | 10 ≤ h ≤ -10, 15 ≤ k ≤ -15, 15 ≤ l ≤ -14                          | 9 ≤ h ≤ -9, 13 ≤ k ≤ -13, 25 ≤ l ≤ -25                           |



## 6. Additional screening and recrystallization of samples

Crystallization of **11**, **13**, and **14** was performed by placing ~1 mg of powder as received into 6 x 50 mm borosilicate culture tubes purchased from VWR. Samples were dissolved in approximately 500  $\mu$ L of solvent and allowed to slowly evaporate at room temperature. Higher boiling solvents were evaporated from open containers, while low boiling solvents required placing the culture tube inside an empty dram vial with a slightly loosened cap. If the initial solvent failed to produce a solid after fully evaporating based on visual inspection, the amorphous samples were re-dissolved in the same culture tube with a new solvent mixture. Evaporation occurred until precipitation was observed. Sample crystallization time spanned from overnight to 3 days. Samples **11** and **13** were obtained from slow evaporation from a 50/50 mixture of acetonitrile and water. The crystals were dried under reduced pressure. Sample **14** was crystallized from slow evaporation of diethyl ether. The crystals were placed onto a grid as dry powder. All crystals were screened at cryogenic temperatures as outlined in Supporting Information, section 3. Before typical screening, the prepared grid was plunged frozen in liquid nitrogen and transferred into the TEM while the holder was maintained at cryogenic temperatures. Sample **15** was generated from slow evaporation from H<sub>2</sub>O with a small amount of DMSO (10% v/v). The crystals were blotted with a kimwipe and dried under reduced pressure to remove excess solvent before diffraction experiments in cryogenic temperature. Sample **12** was screened in the same manner as described in Supporting Information, section 2 for ~4 additional hours at room temperature to locate monocrystalline domains in a largely polycrystalline sample.

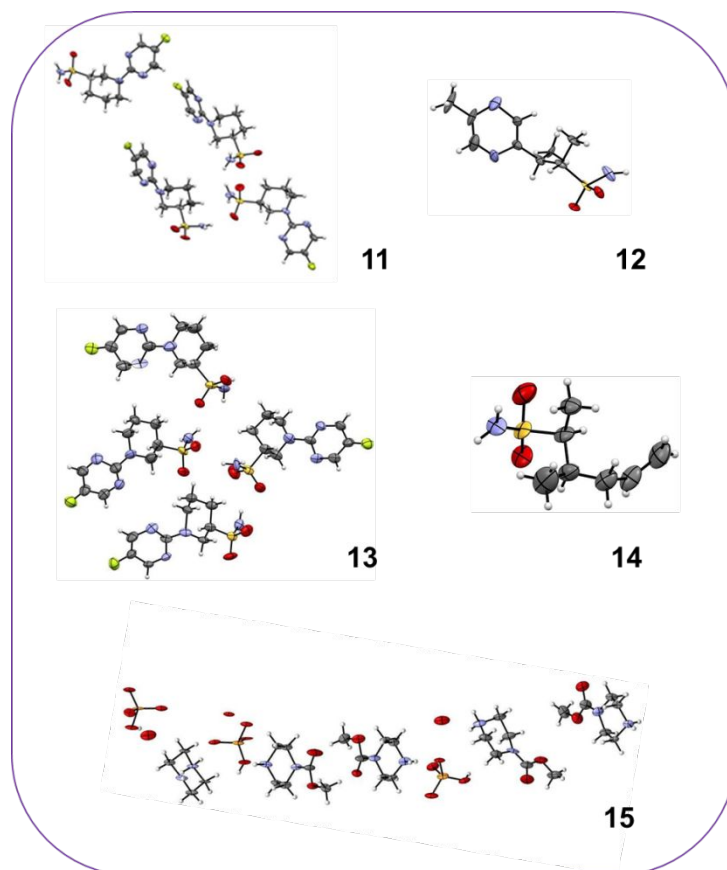

**Figure S5.** Contents of the asymmetric unit of compounds **11-15** obtained after additional screening and recrystallization trials. Ellipsoids probability: 50 %

**Table S4.** Selected crystallographic data for compounds **11-15** obtained after additional screening and recrystallization trials.

| Compound                                   | 11                                                                            | 12                                                                                                 | 13                                                                            | 14                                                                           | 15                                                                                                 |
|--------------------------------------------|-------------------------------------------------------------------------------|----------------------------------------------------------------------------------------------------|-------------------------------------------------------------------------------|------------------------------------------------------------------------------|----------------------------------------------------------------------------------------------------|
| Empirical formula                          | C <sub>9</sub> H <sub>13</sub> N <sub>4</sub> O <sub>2</sub> SF               | C <sub>9</sub> H <sub>15</sub> N <sub>3</sub> O <sub>2</sub> S                                     | C <sub>9</sub> H <sub>13</sub> N <sub>4</sub> O <sub>2</sub> SF               | C <sub>7</sub> H <sub>15</sub> NO <sub>2</sub> S                             | C <sub>28</sub> H <sub>66</sub> N <sub>10</sub> O <sub>23</sub> P <sub>3</sub>                     |
| Formula weight                             | 260.29                                                                        | 229.3                                                                                              | 260.29                                                                        | 177.26                                                                       | 1003.82                                                                                            |
| <b>Data Collection</b>                     |                                                                               |                                                                                                    |                                                                               |                                                                              |                                                                                                    |
| Type of instrument                         | Talos F200C                                                                   | Talos F200C                                                                                        | Talos F200C                                                                   | Talos F200C                                                                  | Talos F200C                                                                                        |
| Wavelength (Å)                             | 0.0251                                                                        | 0.0251                                                                                             | 0.0251                                                                        | 0.0251                                                                       | 0.0251                                                                                             |
| Data collection temperature (K)            | 96(4)                                                                         | 294(4)                                                                                             | 96(4)                                                                         | 96(4)                                                                        | 96(4)                                                                                              |
| Unit cell dimensions                       | <i>a</i> = 22.990(2) Å,<br><i>b</i> = 37.240(4) Å,<br><i>c</i> = 4.6400(10) Å | <i>a</i> = 22.0000(10) Å,<br><i>b</i> = 6.410(2) Å,<br><i>c</i> = 7.060(4) Å,<br>$\beta$ = 91.18 ° | <i>a</i> = 23.000(2) Å,<br><i>b</i> = 38.090(4) Å,<br><i>c</i> = 4.6000(10) Å | <i>a</i> = 7.4100(10) Å,<br><i>b</i> = 9.270(2) Å,<br><i>c</i> = 12.490(4) Å | <i>a</i> = 66.2000(10) Å,<br><i>b</i> = 6.220(2) Å,<br><i>c</i> = 9.940(4) Å,<br>$\beta$ = 92.14 ° |
| Volume                                     | 3972.5(10)                                                                    | 995.4(4)                                                                                           | 4029.9(10)                                                                    | 857.9(4)                                                                     | 4090(2)                                                                                            |
| Z, Z'                                      | 16, 4                                                                         | 4, 1                                                                                               | 16, 4                                                                         | 4, 1                                                                         | 4                                                                                                  |
| Crystal system                             | Orthorhombic                                                                  | Monoclinic                                                                                         | Orthorhombic                                                                  | Orthorhombic                                                                 | Monoclinic                                                                                         |
| Space group                                | <i>P</i> 2 <sub>1</sub> 2 <sub>1</sub> 2                                      | <i>C</i> 2                                                                                         | <i>P</i> 2 <sub>1</sub> 2 <sub>1</sub> 2                                      | <i>P</i> 2 <sub>1</sub> 2 <sub>1</sub> 2 <sub>1</sub>                        | <i>C</i> c                                                                                         |
| Density (calculated) (g/cm <sup>3</sup> )  | 1.741                                                                         | 1.530                                                                                              | 1.716                                                                         | 1.372                                                                        | 1.630                                                                                              |
| F(000)                                     | 43                                                                            | 49                                                                                                 | 170                                                                           | 29                                                                           | 169                                                                                                |
| Measured reflections                       | 4964                                                                          | 1265                                                                                               | 4939                                                                          | 1002                                                                         | 5976                                                                                               |
| Reflections with <i>I</i> > 2s( <i>I</i> ) | 3031                                                                          | 789                                                                                                | 3181                                                                          | 461                                                                          | 3714                                                                                               |
| Resolution (Å)                             | 0.90                                                                          | 0.90                                                                                               | 0.90                                                                          | 0.90                                                                         | 0.85                                                                                               |
| Completeness (%)                           | 83.10                                                                         | 86.50                                                                                              | 82.60                                                                         | 80.30                                                                        | 84.6                                                                                               |
| Index ranges                               | 25 ≤ <i>h</i> ≤ -25, 37 ≤ <i>k</i> ≤ -36, 5 ≤ <i>l</i> ≤ -5                   | 24 ≤ <i>h</i> ≤ -24, 7 ≤ <i>k</i> ≤ -7, 7 ≤ <i>l</i> ≤ -7                                          | 25 ≤ <i>h</i> ≤ -25, 38 ≤ <i>k</i> ≤ -38, 5 ≤ <i>l</i> ≤ -5                   | 8 ≤ <i>h</i> ≤ -8, 9 ≤ <i>k</i> ≤ -9, 12 ≤ <i>l</i> ≤ -12                    | 70 ≤ <i>h</i> ≤ -71, 7 ≤ <i>k</i> ≤ -7, 11 ≤ <i>l</i> ≤ -11                                        |

## 7. Transmission electron microscope images of crystals

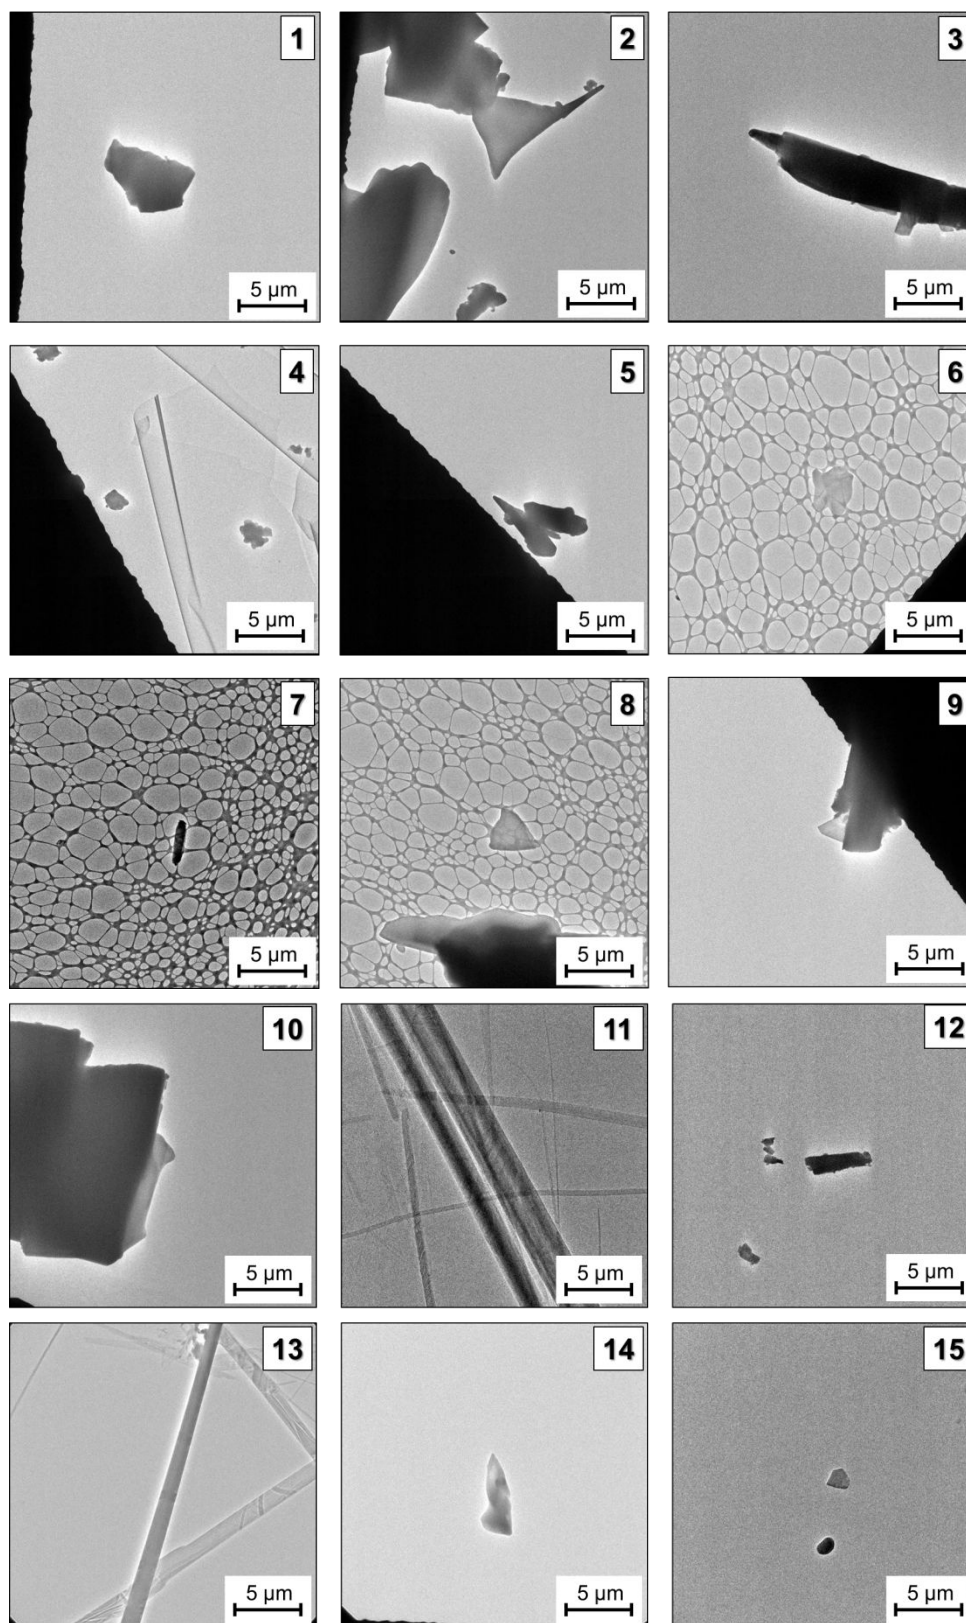

Figure S6. TEM image of crystals 1-15 at 2600x magnification.

## 8. Automated data processing procedure

Given the ability to collect multiple datasets in a matter of minutes, to further expedite structural analysis, we wanted the ability for a single user to simultaneously collect and process data. To facilitate this, our laboratory has developed a Python script that interacts with existing programs utilized for processing microED data to allow for automated conversion and indexing, inspired by similar automation developed for serial rotation electron diffraction [9].

Movie files are saved with sample name, detector distance, stage rotation speed, camera integration time, and rotation angle, allowing for automated importing of these values into the processing software, as follow:

```
samplename-mov1_960_0.3_3_cryo.ser
```

Where samplename-mov1 can be any name not including an underscore or special character, as this will become the name of the folder containing processed data, 960 is the detector distance used (in mm), 0.3 is the rotation speed of the stage (in °/s), 3 is the image integration time (in s), and cryo can be any additional notes about the sample and can include underscores.

On a computer running Ubuntu Windows Subsystem for Linux with properly installed XDS suite and the free ser2smv2 data conversion file [15], “python3 auto\_indexing.py” is called to run Python3.8 in a folder containing an executable copy of ser2smv, the python scripts, and the .ser movie files to be processed. Merging and solutions obtained subsequent to autoprocessing were done by the user.

After executing the Python script, an open source movie conversion program is called to convert each SER movie to individual SMV frames (ser2smv) [15]. After conversion, the Python script writes a custom XDS.INP file with the appropriate settings based on our TEM settings and attempts to index and integrate frames using XDS [16]. The script is capable of detecting errors commonly encountered from our previous processing efforts and automatically corrects and re-subjects the data to XDS processing as needed until the dataset is either successfully integrated, or an upper limit is reached and the data is determined to be unindexable by the automated program. Furthermore, the script generates and executes the scaling program XSCALE and converts the data to SHELX format using XDSCONV [17].

Once one or more processed movies are obtained, a user can either directly solve the data by using the SHELX software suite, or quickly merge multiple pre-processed datasets using XSCALE before submitting to SHELX. After obtaining these preliminary solutions from SHELXT or SHELXD, the data was refined using SHELXL within ShelXle. The script is available for download in the supporting information section.

## 9. Data processing for the kinematical approach.

A Python script was created by our laboratory to convert and pre-process the diffraction movies collected. In the first step of the conversion, movies were converted into individual SMV frames by the open source movie conversion program ser2smv [15]. After conversion, the Python script writes a custom XDS.INP file based on our TEM settings and attempts to index and integrate frames using XDS software. The script is capable of detecting errors commonly encountered from our previous processing efforts and automatically corrects and re-subjects the data to XDS processing as needed until the dataset is either successfully integrated, or an upper limit is reached and the data is determined to be unindexable by the automated program. Furthermore, the script generates and executes the scaling program XSCALE and converts the HKL file using XDSCONV [15–17]. From the processed diffraction movies, the user can either directly solve the data using the SHELX software suite, or quickly merge multiple pre-processed datasets using XSCALE before submitting to SHELX. After obtaining these preliminary solutions from SHELXT or SHELXD, the data was refined using SHELXL within ShelXle [18–21].

## 10. Data Processing for the dynamical approach.

To process the diffraction images with Pets2.0 software [22], it was noted that images converted with ser2smv software were rotated counterclockwise ( $-90^\circ$ ) and vertically flipped in comparison with the movies collected in the microscope. Thus, after converting the images from SMV to TIFF 16-bit format using an in house script, the TIFF images were further processed by rotating and flipping the images to the correct orientation.

All dynamical refinement experiments were performed in a single movie. Before processing the data with Pets software, all movies collected in the previous microED experiment were screened and diffraction datasets with the best statistics were chosen for dynamical refinement (typically movies with completeness higher than 70 %, resolution lower than 1.0 Å and  $I/\sigma$  higher than 2.0).

Electron diffraction data were imported to Pets2.0 software, with  $\lambda = 0.0251 \text{ \AA}$ ,  $\text{aperpixel} = 0.00123 \text{ \AA}^{-1}$ ,  $\text{bin} = 2$ , in the continuous rotation mode where rotation semi-angle was  $0.45^\circ$ . The angle of the first frame ( $\alpha$ ) varied according to the diffraction movie collected, and the steps of rotation ( $\alpha$  step) was fixed as  $0.9^\circ$ . Data were processed with fixed  $\text{GY} = 26$  and  $\Psi = 780$  as all data was collected with the same Ceta-D detector. The beam stop was added manually for each sample and images were centered manually using the Friedel pairs option. The peak search was carried out with a reflection diameter varying between 3 and 10 pixels, and  $I/\sigma$  varying between 3 and 30. The rotation of the tilt axis around  $\omega = 0^\circ$  was performed and the peak analysis tool was used to check the quality of the reflections obtained. The initial unit cell was found and refined considering the refinement of the unit cell and distortions according to the correct symmetry. When necessary, the unit cell was manually transformed using the transformation matrix tool to match the results obtained with XDS.

Initial processing of the frames for integration was performed with the intensity determination method of sum counts, where the rocking curve and mosaicity values were initially set to 0.001. Once the camel plot was established, both parameters were optimized until a reliable fit between the curves was obtained. Frame geometry was optimized with uniform intensity considering the distortions and with polynomial smoothing correction of the angles with order 4. The frames were again processed for integration with the fit profile option and integration was finalized with the intensity estimation "integrate profile", choosing the correct Laue class, refining the error model, and with automatic virtual frame parameters. This process generates two files: *XX.cif\_pets* for kinematical solution and refinement and *XX\_dyn.cif\_pets* file for dynamical refinement of the crystal structures.

## 11. Kinematical and Dynamical Refinement with Jana2020.

For the kinematical refinement of the crystal structure using Jana2020 software [23], the *XX.cif\_pets* file was imported and the crystal structure was solved with Shelxt within Jana2020 suite. When solution of the kinematical structure was not possible, the CIF or INS files were imported in the software and refined with isotropic atoms against the *XX.cif\_pets* file. Hydrogens were positioned using fixed restraints with typical neutron distances and when necessary interatomic distances and angles were fixed. Samples **8** and **11** were refined with fixed coordinates. All kinematical solutions were refined with 10 cycles of refinement, enabling atoms with too large isotropic ADPs and on  $F^2$ .

For dynamical refinement, the *XX\_dyn.cif\_pets* reflection file was imported in the software for refinement against the structural model. Thickness plots were obtained by optimizing the thickness with  $\text{RSg}(\text{max})$  was fixed to 0.66 while  $g(\text{max})$  was set according to the sample, and general EDThick parameter was obtained based on thickness plots. Dynamical refinement was carried out with 10 cycles of refinement, enabling atoms with too large isotropic ADPs and on  $F$ . Once the refinement of the structure was concluded, the enantiomorph was inverted and the same refinement procedure was performed. Both enantiomeric pairs refined with dynamical refinement had their chirality assigned by the geometry tool within Platon software [24]. The correct enantiomer is assigned by the crystal structures with lower values of  $R(\text{obs})$ ,  $wR(\text{obs})$ ,  $R(\text{all})$ , and  $wR(\text{all})$ .

## 12. Dynamical refinement results

**Table S5.** Statistics of the movies selected for dynamical refinement processed with XDS and Pets2.0.

| Sample | Movie # | Rotation of sample | XDS            |                  |                    |          |          | Pets2.0        |                  |      |                |               |
|--------|---------|--------------------|----------------|------------------|--------------------|----------|----------|----------------|------------------|------|----------------|---------------|
|        |         |                    | Resolution (Å) | Completeness (%) | R-factor (obs) (%) | Mean I/σ | CC (1/2) | Resolution (Å) | Completeness (%) | I/σ  | Rint (obs) (%) | Rint(all) (%) |
| 1      | 4       | p45n50             | 0.90           | 71.5             | 9.9                | 4.79     | 98.1     | 0.83           | 79               | 3.77 | 15.06          | 15.71         |
| 2      | 2       | n60p60             | 0.90           | 82.9             | 16.5               | 5.97     | 99.2     | 0.89           | 87               | 2.97 | 18.43          | 19.16         |
| 3      | 1       | p60n60             | 0.90           | 65.3             | 14.8               | 5.12     | 98.5     | 0.91           | 69               | 3.75 | 20.74          | 21.23         |
| 4      | 2       | n60p60             | 1.00           | 88.7             | 38.9               | 4.19     | 96.5     | 1              | 91               | 3.27 | 19.21          | 20.19         |
| 5      | 9       | n65p60             | 0.90           | 79.9             | 14.1               | 4.69     | 98.4     | 1              | 92               | 3.62 | 17.17          | 17.53         |
| 6      | 1       | n50p50             | 0.85           | 98.3             | 15.6               | 5.06     | 98.6     | 0.86           | 100              | 2.91 | 20.24          | 21.86         |
| 7      | 6       | n60p60             | 0.90           | 49.5             | 9.1                | 5.72     | 97.8     | 0.88           | 56               | 6.71 | 11.14          | 11.37         |
| 8      | 4       | n60p60             | 1.10           | 78.3             | 14.1               | 4.72     | 97.2     | 0.95           | 82               | 3.08 | 21.95          | 23.78         |
| 9      | 8       | p60n45             | 0.90           | 90.7             | 22.1               | 4.40     | 97.8     | 0.83           | 93               | 2.69 | 22.86          | 24.31         |
| 10     | 12      | n60p50             | 1.10           | 75.4             | 28.3               | 5.06     | 97.6     | 1              | 77               | 2.55 | 25.89          | 27.25         |
| 11     | 25      | p65n20             | 0.90           | 81.2             | 16.9               | 5.00     | 98.7     | 1              | 83               | 2.39 | 21.98          | 25.73         |
| 12     | 7       | n60p60             | 0.90           | 76.8             | 12.6               | 5.73     | 99.1     | 0.91           | 79               | 3.86 | 15.96          | 16.42         |
| 13     | 16      | p30n50             | 0.90           | 77.4             | 13.1               | 5.48     | 99.4     | 0.91           | 80               | 3.33 | 18.59          | 20.38         |
| 14     | 5       | p40n30             | 0.90           | 72.5             | 13.4               | 4.31     | 99.2     | 0.83           | 76               | 2.91 | 18.22          | 19.67         |

**Table S6.** Kinematic and dynamical refinements statistics. Dynamical refinement (dyn) for enant 1 (structure as solved) and enant 2 (inverted enantiomer). Samples **8** and **11** were refined with fixed atomic coordinates. All samples were refined with isotropic atoms.

| Sample | Kinematic solution   | Refinement with Jana2020 |                        |                    |                    |                      |                       |                      |                       |
|--------|----------------------|--------------------------|------------------------|--------------------|--------------------|----------------------|-----------------------|----------------------|-----------------------|
|        |                      | Type of refinement       | R-factors              | GOF <sub>obs</sub> | GOF <sub>all</sub> | R <sub>obs</sub> (%) | wR <sub>obs</sub> (%) | R <sub>all</sub> (%) | wR <sub>all</sub> (%) |
| 1      | microED CIF imported | Kinematical              | [6707=4211+2496/297]   | 2.26               | 1.99               | 25.47                | 51.71                 | 26.82                | 54.65                 |
|        |                      | Dyn – enant 1            | [7466=2807+4659/342]   | 4.16               | 2.61               | 12.59                | 11.60                 | 18.73                | 12.21                 |
|        |                      | Dyn – enant 2            | [7466=2807+4659/342]   | 5.37               | 3.33               | 15.55                | 14.95                 | 22.18                | 15.59                 |
| 2      | Shelxt on Jana       | Kinematical              | [1448=1091+357/65]     | 2.38               | 2.19               | 23.22                | 47.98                 | 24.47                | 49.63                 |
|        |                      | Dyn – enant 1            | [5592=1537+4055/130]   | 5.00               | 2.69               | 15.10                | 15.16                 | 23.14                | 15.70                 |
|        |                      | Dyn – enant 2            | [5592=1537+4055/130]   | 4.28               | 2.33               | 13.07                | 12.97                 | 21.50                | 13.59                 |
| 3      | microED CIF imported | Kinematical              | [4315=2649+1666/297-2] | 2.47               | 2.06               | 22.88                | 45.67                 | 24.64                | 47.86                 |
|        |                      | Dyn – enant 1            | [8214=3187+5027/362]   | 4.75               | 3.01               | 14.40                | 14.10                 | 20.76                | 14.73                 |
|        |                      | Dyn – enant 2            | [8214=3187+5027/362]   | 3.95               | 2.54               | 12.47                | 11.74                 | 18.67                | 12.41                 |

| Sample | Kinematic solution   | Refinement with Jana2020 |                       |                    |                    |                      |                       |                      |                       |
|--------|----------------------|--------------------------|-----------------------|--------------------|--------------------|----------------------|-----------------------|----------------------|-----------------------|
|        |                      | Type of refinement       | R-factors             | GOF <sub>obs</sub> | GOF <sub>all</sub> | R <sub>obs</sub> (%) | wR <sub>obs</sub> (%) | R <sub>all</sub> (%) | wR <sub>all</sub> (%) |
| 4      | microED CIF imported | Kinematical              | [1468=620+848/65]     | 2.94               | 2.34               | 23.28                | 28.06                 | 35.32                | 32.46                 |
|        |                      | Dyn – enant 1            | [3924=561+3363/130]   | 2.63               | 1.11               | 10.44                | 9.07                  | 24.41                | 10.51                 |
|        |                      | Dyn – enant 2            | [3924=561+3363/130]   | 2.84               | 1.21               | 11.13                | 9.82                  | 26.12                | 11.45                 |
| 5      | microED CIF imported | Kinematical              | [2457=1896+561/157]   | 2.15               | 2.05               | 21.15                | 46.29                 | 22.74                | 49.14                 |
|        |                      | Dyn – enant 1            | [3536=1339+2197/225]  | 2.77               | 1.82               | 10.50                | 9.30                  | 17.19                | 10.26                 |
|        |                      | Dyn – enant 2            | [3536=1339+2197/225]  | 3.63               | 2.33               | 13.36                | 12.20                 | 20.05                | 13.10                 |
| 6      | Shelxt on Jana       | Kinematical              | [1618=1206+412/61]    | 2.69               | 2.47               | 32.20                | 59.06                 | 32.71                | 60.85                 |
|        |                      | Dyn – enant 1            | [3768=1651+2117/120]  | 6.27               | 4.20               | 16.25                | 16.50                 | 21.58                | 16.85                 |
|        |                      | Dyn – enant 2            | [3768=1651+2117/120]  | 5.52               | 3.71               | 14.47                | 14.53                 | 19.61                | 14.87                 |
| 7      | microED CIF imported | Kinematical              | [4830=3681+1149/329]  | 3.83               | 3.48               | 22.39                | 29.01                 | 25.35                | 30.13                 |
|        |                      | Dyn – enant 1            | [4637=2207+2430/382]  | 4.16               | 2.90               | 13.00                | 12.40                 | 17.88                | 13.01                 |
|        |                      | Dyn – enant 2            | [4637=2207+2430/382]  | 4.89               | 3.38               | 15.12                | 14.57                 | 20.48                | 15.2                  |
| 8      | microED CIF imported | Kinematical              | [2203=1182+1021/40]   | 2.52               | 2.16               | 21.57                | 28.01                 | 26.01                | 30.53                 |
|        |                      | Dyn – enant 1            | [3053=752+2301/104]   | 5.02               | 2.58               | 15.15                | 14.88                 | 24.61                | 15.61                 |
|        |                      | Dyn – enant 2            | [3053=752+2301/104]   | 5.78               | 2.95               | 16.24                | 17.13                 | 25.72                | 17.81                 |
| 9      | microED CIF imported | Kinematical              | [4749=2906+1843/173]  | 2.05               | 1.89               | 21.05                | 45.24                 | 24.62                | 50.55                 |
|        |                      | Dyn – enant 1            | [11022=3085+7937/229] | 3.11               | 1.73               | 11.01                | 10.34                 | 18.06                | 10.99                 |
|        |                      | Dyn – enant 2            | [11022=3085+7937/229] | 4.81               | 2.61               | 15.90                | 15.97                 | 23.11                | 16.61                 |
| 10     | microED CIF imported | Kinematical              | [2273=1598+675/169]   | 1.96               | 1.80               | 19.67                | 41.85                 | 22.32                | 44.34                 |
|        |                      | Dyn – enant 1            | [6576=985+5591/228]   | 2.06               | 1.03               | 9.85                 | 8.92                  | 23.06                | 12.09                 |
|        |                      | Dyn – enant 2            | [6576=985+5591/228]   | 2.52               | 1.18               | 11.79                | 10.94                 | 24.48                | 13.80                 |
| 11     | microED CIF imported | Kinematical              | [3702=1605+2097/69]   | 2.09               | 1.71               | 17.65                | 25.85                 | 25.60                | 28.66                 |
|        |                      | Dyn – enant 1            | [7659=1216+6443/115]  | 3.80               | 1.63               | 13.83                | 12.76                 | 39.75                | 13.91                 |
|        |                      | Dyn – enant 2            | [7659=1216+6443/115]  | 4.57               | 1.92               | 15.88                | 15.63                 | 32.22                | 16.41                 |
| 12     | Shelxt on Jana       | Kinematical              | [1145=840+305/61]     | 2.33               | 2.13               | 23.27                | 46.56                 | 24.55                | 48.45                 |
|        |                      | Dyn – enant 1            | [1785=617+1168/126]   | 3.34               | 2.04               | 11.84                | 10.79                 | 18.19                | 11.51                 |
|        |                      | Dyn – enant 2            | [1785=617+1168/126]   | 2.56               | 1.59               | 9.30                 | 8.29                  | 15.51                | 8.95                  |
| 13     | microED CIF imported | Kinematical              | [4814=2305+2509/273]  | 2.46               | 1.95               | 16.55                | 22.14                 | 26.81                | 24.96                 |
|        |                      | Dyn – enant 1            | [9950=1468+8482/318]  | 3.28               | 1.30               | 10.38                | 8.77                  | 27.51                | 9.84                  |
|        |                      | Dyn – enant 2            | [9950=1468+8482/318]  | 4.48               | 1.76               | 14.08                | 12.00                 | 34.31                | 13.31                 |
| 14     | microED CIF imported | Kinematical              | [1156=620+536/45]     | 3.08               | 2.69               | 28.21                | 36.50                 | 33.71                | 40.14                 |
|        |                      | Dyn – enant 1            | [2035=711+1324/82]    | 7.12               | 4.25               | 17.99                | 19.25                 | 27.50                | 19.78                 |
|        |                      | Dyn – enant 2            | [2035=711+1324/82]    | 6.30               | 3.78               | 16.84                | 17.03                 | 25.63                | 17.57                 |

**Table S7.** Statistical results using enantprob software for enantiomeric pairs analyzed with dynamical refinement. Enant represents the order the files were input in the enantprob software, where enant1 is the structure as solved and enant2 is the inverted structure.

| Sample | Enant | Total | better for 1 | better for 2 | prob(wrong) | sigma level | prob(1)  | Rval1  | Rval2  | Rval2/1 |
|--------|-------|-------|--------------|--------------|-------------|-------------|----------|--------|--------|---------|
| 1      | 1     | 5376  | 3132         | 2244         | 2091        | 12.111      | 1.000000 | 18.693 | 22.143 | 1.185   |
|        | 2     | 7466  | 4177         | 8289         | 0           | 10.277      | 1.000000 |        |        |         |
| 2      | 2     | 3533  | 1893         | 1640         | 2058        | 4.256       | 0.999990 | 21.313 | 22.937 | 1.076   |
|        | 1     | 5591  | 2922         | 2669         | 0           | 3.384       | 0.999642 |        |        |         |
| 3      | 2     | 5839  | 3200         | 2639         | 2374        | 7.342       | 1.000000 | 18.646 | 20.727 | 1.112   |
|        | 1     | 8213  | 4387         | 3826         | 0           | 6.190       | 1.000000 |        |        |         |
| 4      | 1     | 2296  | 1249         | 1047         | 1628        | 4.216       | 0.999988 | 24.118 | 25.815 | 1.070   |
|        | 2     | 3924  | 2063         | 1861         | 0           | 3.225       | 0.999369 |        |        |         |
| 5      | 1     | 2438  | 1409         | 1029         | 1099        | 7.696       | 1.000000 | 17.159 | 20.005 | 1.166   |
|        | 2     | 3536  | 1958         | 1578         | 0           | 6.390       | 1.000000 |        |        |         |
| 6      | 2     | 2610  | 1446         | 1164         | 1159        | 5.520       | 1.000000 | 19.568 | 21.536 | 1.101   |
|        | 1     | 3768  | 2025         | 1743         | 0           | 4.594       | 0.999998 |        |        |         |
| 7      | 1     | 3575  | 2022         | 1553         | 1062        | 7.844       | 1.000000 | 17.851 | 20.452 | 1.146   |
|        | 2     | 4637  | 2553         | 2084         | 0           | 6.887       | 1.000000 |        |        |         |
| 8      | 1     | 1855  | 931          | 924          | 1198        | 0.163       | 0.564555 | 24.442 | 25.544 | 1.045   |
|        | 2     | 3053  | 1530         | 1523         | 0           | 0.127       | 0.550406 |        |        |         |
| 9      | 1     | 7388  | 4523         | 2865         | 3635        | 19.290      | 1.000000 | 17.990 | 23.017 | 1.279   |
|        | 2     | 11022 | 6340         | 4682         | 0           | 15.793      | 1.000000 |        |        |         |
| 10     | 1     | 4000  | 2146         | 1854         | 2576        | 4.617       | 0.999998 | 22.950 | 24.367 | 1.062   |
|        | 2     | 6576  | 3434         | 3142         | 0           | 3.601       | 0.999841 |        |        |         |
| 11     | 1     | 4747  | 2614         | 2133         | 2912        | 6.981       | 1.000000 | 28.909 | 31.311 | 1.083   |
|        | 2     | 7659  | 4070         | 3589         | 0           | 5.496       | 1.000000 |        |        |         |
| 12     | 2     | 1195  | 675          | 520          | 591         | 4.484       | 0.999996 | 15.459 | 18.139 | 1.173   |
|        | 1     | 1785  | 970          | 815          | 0           | 3.669       | 0.999878 |        |        |         |
| 13     | 1     | 6414  | 3968         | 2446         | 3537        | 19.004      | 1.000000 | 26.555 | 33.119 | 1.247   |
|        | 2     | 9950  | 5736         | 4214         | 0           | 15.258      | 1.000000 |        |        |         |
| 14     | 2     | 1481  | 790          | 691          | 555         | 2.573       | 0.994952 | 25.503 | 27.365 | 1.073   |
|        | 1     | 2035  | 1067         | 968          | 0           | 2.195       | 0.985903 |        |        |         |



### 13. Single crystal X-ray diffraction

All crystals were measured using a Bruker Venture D8 diffractometer, at 100 K, with Mo K $\alpha$  ( $\lambda = 0.7107 \text{ \AA}$ ) or Cu K $\alpha$  ( $\lambda = 1.5418 \text{ \AA}$ ) radiation. The reflection images (.srmf file) were imported into the software CrysAlis Pro and processed with the smart peak search and background. SHELXS or SHELXT were used for the structure solution and refinement was performed with SHELXL-2014 [17-20], all implemented within the WinGX suite [25]. All atoms, except hydrogen, had atomic coordinates and anisotropic thermal parameters refined to convergence using full-matrix least-square methods on  $F^2$ . Hydrogen atoms bound to carbon atoms were placed in geometric positions and refined with riding modes. Hydrogen atoms bound to nitrogen atoms were found by difference syntheses and refined with isotropic displacement parameters. The correct enantiomer was assigned by the values of the Flack parameter and using Platon software [24].

**Table S8.** Selected crystallographic data for compounds **1**, **3**, **6**, and **11** obtained by single crystal X-ray diffraction (XRD).

|                                                           | <b>1_XRD</b>                                                                                                   | <b>3_XRD</b>                                                                                             | <b>6_XRD</b>                                                                                    | <b>14_XRD</b>                                                                                   |
|-----------------------------------------------------------|----------------------------------------------------------------------------------------------------------------|----------------------------------------------------------------------------------------------------------|-------------------------------------------------------------------------------------------------|-------------------------------------------------------------------------------------------------|
| <b>Empirical formula</b>                                  | C <sub>25</sub> H <sub>29</sub> N <sub>7</sub> O <sub>4</sub> S                                                | C <sub>25</sub> H <sub>29</sub> N <sub>7</sub> O <sub>4</sub> S                                          | C <sub>9</sub> H <sub>15</sub> N <sub>3</sub> O <sub>2</sub> S                                  | C <sub>7</sub> H <sub>15</sub> NO <sub>2</sub> S                                                |
| <b>Formula weight</b>                                     | 523.61                                                                                                         | 523.61                                                                                                   | 229.3                                                                                           | 177.26                                                                                          |
| <b>Temperature (K)</b>                                    | 100(2)                                                                                                         | 100(2)                                                                                                   | 100(2)                                                                                          | 100.00(10)                                                                                      |
| <b>Crystal system</b>                                     | monoclinic                                                                                                     | monoclinic                                                                                               | orthorhombic                                                                                    | orthorhombic                                                                                    |
| <b>Space group</b>                                        | <i>P</i> 2 <sub>1</sub>                                                                                        | <i>P</i> 2 <sub>1</sub>                                                                                  | <i>P</i> 2 <sub>1</sub> 2 <sub>1</sub> 2 <sub>1</sub>                                           | <i>P</i> 2 <sub>1</sub> 2 <sub>1</sub> 2 <sub>1</sub>                                           |
| <b>Unit cell dimensions</b>                               | <i>a</i> = 9.62380(10) Å,<br><i>b</i> = 21.3832(2) Å,<br><i>c</i> = 12.97770(10) Å,<br>$\beta$ = 107.7100(10)° | <i>a</i> = 9.6182(2) Å,<br><i>b</i> = 21.3742(4) Å,<br><i>c</i> = 12.9746(3) Å,<br>$\beta$ = 107.681(2)° | <i>a</i> = 7.52000(10) Å,<br><i>b</i> = 8.4522(2) Å,<br><i>c</i> = 17.0377(3) Å                 | <i>a</i> = 7.68240(10) Å,<br><i>b</i> = 9.8732(2) Å,<br><i>c</i> = 12.6237(3) Å                 |
| <b>Volume (Å<sup>3</sup>)</b>                             | 2544.08(4)                                                                                                     | 2541.34(10)                                                                                              | 1082.93(4)                                                                                      | 957.51(3)                                                                                       |
| <b>Z</b>                                                  | 2                                                                                                              | 2                                                                                                        | 4                                                                                               | 4                                                                                               |
| <b><math>\rho_{\text{calc}}</math> (g/cm<sup>3</sup>)</b> | 1.367                                                                                                          | 1.369                                                                                                    | 1.406                                                                                           | 1.230                                                                                           |
| <b><math>\mu/\text{mm}^{-1}</math></b>                    | 1.519                                                                                                          | 1.521                                                                                                    | 0.284                                                                                           | 2.669                                                                                           |
| <b>F(000)</b>                                             | 1104                                                                                                           | 1104                                                                                                     | 488                                                                                             | 384                                                                                             |
| <b>Radiation</b>                                          | CuK $\alpha$ ( $\lambda = 1.54184$ )                                                                           | CuK $\alpha$ ( $\lambda = 1.54184$ )                                                                     | MoK $\alpha$ ( $\lambda = 0.71073$ )                                                            | CuK $\alpha$ ( $\lambda = 1.54184$ )                                                            |
| <b>2<math>\theta</math> range for data collection (°)</b> | 7.15 to 158.544                                                                                                | 7.15 to 158.716                                                                                          | 4.782 to 52.742                                                                                 | 11.378 to 158.054                                                                               |
| <b>Index ranges</b>                                       | -12 $\leq$ <i>h</i> $\leq$ 11,<br>-27 $\leq$ <i>k</i> $\leq$ 26,<br>-16 $\leq$ <i>l</i> $\leq$ 16              | -12 $\leq$ <i>h</i> $\leq$ 12,<br>-25 $\leq$ <i>k</i> $\leq$ 27,<br>-16 $\leq$ <i>l</i> $\leq$ 16        | -9 $\leq$ <i>h</i> $\leq$ 9,<br>-10 $\leq$ <i>k</i> $\leq$ 10,<br>-21 $\leq$ <i>l</i> $\leq$ 21 | -9 $\leq$ <i>h</i> $\leq$ 9,<br>-12 $\leq$ <i>k</i> $\leq$ 12,<br>-16 $\leq$ <i>l</i> $\leq$ 16 |
| <b>Reflections collected</b>                              | 71284                                                                                                          | 53858                                                                                                    | 14483                                                                                           | 12054                                                                                           |
| <b>Independent reflections</b>                            | 10702<br>[ <i>R</i> <sub>int</sub> = 0.0638,<br><i>R</i> <sub>sigma</sub> = 0.0315]                            | 10584<br>[ <i>R</i> <sub>int</sub> = 0.1225,<br><i>R</i> <sub>sigma</sub> = 0.0805]                      | 2217<br>[ <i>R</i> <sub>int</sub> = 0.0838,<br><i>R</i> <sub>sigma</sub> = 0.0365]              | 2028<br>[ <i>R</i> <sub>int</sub> = 0.0510,<br><i>R</i> <sub>sigma</sub> = 0.0338]              |
| <b>Data/restraints/parameters</b>                         | 10702/1/680                                                                                                    | 10584/1/679                                                                                              | 2217/0/145                                                                                      | 2028/0/120                                                                                      |
| <b>Goodness-of-fit on <math>F^2</math></b>                | 1.079                                                                                                          | 1.031                                                                                                    | 1.084                                                                                           | 1.040                                                                                           |
| <b>Final R indexes [<math>I \geq 2\sigma(I)</math>]</b>   | <i>R</i> <sub>1</sub> = 0.0382,<br><i>wR</i> <sub>2</sub> = 0.1049                                             | <i>R</i> <sub>1</sub> = 0.0494,<br><i>wR</i> <sub>2</sub> = 0.1194                                       | <i>R</i> <sub>1</sub> = 0.0345,<br><i>wR</i> <sub>2</sub> = 0.0898                              | <i>R</i> <sub>1</sub> = 0.0292,<br><i>wR</i> <sub>2</sub> = 0.0735                              |
| <b>Final R indexes [all data]</b>                         | <i>R</i> <sub>1</sub> = 0.0387,<br><i>wR</i> <sub>2</sub> = 0.1054                                             | <i>R</i> <sub>1</sub> = 0.0639,<br><i>wR</i> <sub>2</sub> = 0.1338                                       | <i>R</i> <sub>1</sub> = 0.0350,<br><i>wR</i> <sub>2</sub> = 0.0901                              | <i>R</i> <sub>1</sub> = 0.0333,<br><i>wR</i> <sub>2</sub> = 0.0759                              |
| <b>Largest diff. peak/hole (e Å<sup>-3</sup>)</b>         | 0.31/-0.33                                                                                                     | 0.29/-0.31                                                                                               | 0.45/-0.37                                                                                      | 0.20/-0.24                                                                                      |
| <b>Flack parameter</b>                                    | 0.006(11)                                                                                                      | -0.010(16)                                                                                               | 0.05(7)                                                                                         | -0.005(12)                                                                                      |

## 14. References

- (1) PCT Int. Appl. 2016, WO 2016187308 A1 20161124.
- (2) PCT Int. Appl. 2018, WO 2018097945 A1 20180531.
- (3) PCT/US2015/047472, WO 2016033486 A1.
- (4) PCT Int. Appl. 2018, WO 2018093576 A1 20180524.
- (5) PCT Int. Appl. 2018, WO 2018093577 A1 20180524.
- (6) PCT Int. Appl. 2018, WO 2018093579 A1 20180524.
- (7) PCT Int. Appl. 2018, WO 2018097944 A1 20180531.
- (8) PCT Int. Appl. 2018, WO 2018097945 A1 20180531.
- (9) Hattne, J., et al. Acta Cryst. 2015, 71, 353–360.
- (10) PCT Int. Appl. 2019, WO 2019006231 A1 20190103.
- (11) PCT Int. Appl. 2016, WO 2016141035 A1.
- (12) J. Org. Chem. 2014, 79, 3684–3687.
- (13) J. Med. Chem. 2014, 57, 9796–9810.
- (14) J. Med. Chem. 2018, 61, 453–461.
- (15) Program ser2smv obtained from <https://cryoem.ucla.edu/downloads/snapshots>
- (16) Acta Cryst. 2010, D66, 125–132.
- (17) Acta Cryst. 2010, D66, 133–144.
- (18) Acta Cryst. 2008, A64, 112–122.
- (19) Acta Cryst. 2015 A71, 3–8.
- (20) Acta Cryst. 2015, C71, 3–8.
- (21) J. Appl. Cryst. 2011, 44, 1281–1284.
- (22) Acta Crystallogr. Sect. B Struct. Sci. Cryst. Eng. Mater. 2019, 75 (4), 512–522.
- (23) Cryst. Mater. 2023, 238 (7-8), 271-282.
- (24) Acta Cryst. 2009, D65, 148-155.
- (25) J. Appl. Cryst. 1999, 32, 837-838.
